# Supplementary material for: Cost-effectiveness of Implementing Smoking Cessation Interventions for Patients With Cancer
Source: PubMed Central journal article supplement (PMC9185176; doi:10.1001/jamanetworkopen.2022.16362), 2022-06-09
Supplement: jamanetwopen-e2216362-s001.pdf [file jamanetwopen-e2216362-s001.pdf]

## Supplemental Online Content

Levy DE, Regan S, Perez GK, et al. Cost-effectiveness of implementing smoking cessation interventions for patients with cancer. *JAMA Netw Open*. 2022;5(6):e2216362.  
doi:10.1001/jamanetworkopen.2022.16362

**eTable 1.** Descriptions of Simulation Parameters: Training

**eTable 2.** Descriptions of Simulation Parameters: Patient Identification Activities Conducted by Research Assistant

**eTable 3.** Descriptions of Simulation Parameters: Counseling Delivery

**eTable 4.** Descriptions of Simulation Parameters: Medication Costs (per Fill)

**eTable 5.** Descriptions of Simulation Parameters: Other Resources

**eTable 6.** Descriptions of Simulation Parameters: Wages

**eTable 7.** Descriptions of Simulation Parameters: Stochastic Parameters

This supplemental material has been provided by the authors to give readers additional information about their work.

**eTable 1. Descriptions of Simulation Parameters: Training**

| <i>Tasks</i>                                  | <i>Quantity/duration</i>        | <i>Cost</i>                                                                   |
|-----------------------------------------------|---------------------------------|-------------------------------------------------------------------------------|
| <i>Initial</i>                                |                                 |                                                                               |
| Training courses                              | 45 hours per counselor          | \$1150 tuition plus counselor time and ancillary (e.g., transportation) costs |
| One-on-one motivational interviewing training | 4 hours per counselor           | Counselor (trainee) time, psychologist (trainer) time                         |
| Program staff training                        | 40 hours x 1 research assistant | Research Assistant (trainee) time, psychologist (trainer) time                |
| <i>Ongoing</i>                                |                                 |                                                                               |
| Counselor supervision                         | 1 hour per counselor per week   | Counselor time, psychologist time                                             |

Note: Site A employed 3 counselors, Site B employed 2 counselors.

**eTable 2. Descriptions of Simulation Parameters: Patient Identification Activities Conducted by Research Assistant<sup>a</sup>**

| <i>Pre-enrollment activities</i>                                                           | <i>Site A</i> |                     | <i>Site B</i> |                     |
|--------------------------------------------------------------------------------------------|---------------|---------------------|---------------|---------------------|
|                                                                                            | <i>N</i>      | <i>Time (hours)</i> | <i>N</i>      | <i>Time (hours)</i> |
| Screen daily clinic schedule for potential eligible participants                           | n/a           | n/a                 | 12137         | 0.02                |
| Chart screen those who are identified as potential eligible participants                   | 3274          | 0.17                | 1435          | 0.13                |
| Introductory phone calls to potential participants (includes multiple calls, missed calls) | 7954          | 0.17                | 3312          | 0.08                |
| Recruitment activities at clinic visit                                                     | 582           | 0.15                | 485           | 0.5                 |

<sup>a</sup> In practice, role might be fulfilled by a social worker and/or medical assistant.

**eTable 3. Descriptions of Simulation Parameters: Counseling Delivery**

| <i>Counseling sessions<br/>(counseling and<br/>documentation)</i> | <i>Overall</i>                                 |                                         | <i>Site A</i>                                  |                                         | <i>Site B</i>                                  |                                         |
|-------------------------------------------------------------------|------------------------------------------------|-----------------------------------------|------------------------------------------------|-----------------------------------------|------------------------------------------------|-----------------------------------------|
|                                                                   | <i>% Sessions<br/>completed</i>                | <i>Average<br/>duration<br/>(hours)</i> | <i>% Sessions<br/>completed</i>                | <i>Average<br/>duration<br/>(hours)</i> | <i>% Sessions<br/>completed</i>                | <i>Average<br/>duration<br/>(hours)</i> |
| Session 1                                                         | 100%                                           | 1.23                                    | 100%                                           | 1.87                                    | 100%                                           | 0.84                                    |
| Session 2                                                         | 89%                                            | 0.82                                    | 86%                                            | 1.31                                    | 91%                                            | 0.54                                    |
| Session 3                                                         | 76%                                            | 0.77                                    | 74%                                            | 1.21                                    | 77%                                            | 0.51                                    |
| Session 4                                                         | 65%                                            | 0.75                                    | 55%                                            | 1.26                                    | 70%                                            | 0.50                                    |
| Session 5                                                         | 73%                                            | 0.85                                    | 67%                                            | 1.42                                    | 76%                                            | 0.53                                    |
| Session 6                                                         | 56%                                            | 0.78                                    | 44%                                            | 1.36                                    | 63%                                            | 0.52                                    |
| Session 7                                                         | 54%                                            | 0.69                                    | 25%                                            | 1.52                                    | 72%                                            | 0.51                                    |
| Session 8                                                         | 51%                                            | 0.65                                    | 18%                                            | 1.36                                    | 71%                                            | 0.54                                    |
| Session 9                                                         | 61%                                            | 0.76                                    | 47%                                            | 1.32                                    | 69%                                            | 0.52                                    |
| Session 10                                                        | 51%                                            | 0.66                                    | 33%                                            | 1.15                                    | 62%                                            | 0.50                                    |
| Session 11                                                        | 47%                                            | 0.60                                    | 25%                                            | 1.12                                    | 61%                                            | 0.46                                    |
| Call attempts                                                     |                                                |                                         |                                                |                                         |                                                |                                         |
| Ad hoc counseling/<br>urgent issues:<br>psychologist time         | Occurs for<br>3.3% of<br>completed<br>sessions | 0.50                                    | Occurs for<br>6.4% of<br>completed<br>sessions | 0.50                                    | Occurs for<br>1.9% of<br>completed<br>sessions | 0.50                                    |
| Ad hoc counseling/<br>urgent issues:<br>counselor time            | Occurs for<br>1.9% of<br>completed<br>sessions | 0.17                                    | Occurs for<br>0.8% of<br>completed<br>sessions | 0.17                                    | Occurs for<br>2.4% of<br>completed<br>sessions | 0.17                                    |

**eTable 4. Descriptions of Simulation Parameters: Medication Costs (per Fill)<sup>b</sup>**

|                                                     | <i>Overall, \$ (n)</i> | <i>Site A, \$ (n)</i> | <i>Site B, \$ (n)</i> |
|-----------------------------------------------------|------------------------|-----------------------|-----------------------|
| Varenicline, 0.5mg and 1mg starter pack, 53 tablets | \$282.39 (19)          | \$282.39 (7)          | \$282.39 (12)         |
| Varenicline, 1mg, continuing, 56 tablets            | \$385.20 (27)          | \$385.20 (12)         | \$385.20 (15)         |
| Bupropion, 150mg, 60 tablets                        | \$229.12 (15)          | \$229.12 (2)          | \$229.12 (13)         |
| Nicotine patch, 7mg or 14mg or 21mg, 14 patches     | \$51.96 (156)          | \$51.96 (43)          | \$51.96 (113)         |
| Nicotine lozenges, 2mg or 4mg; 81 pieces            | \$22.19 (163)          | \$22.19 (36)          | \$22.19 (127)         |
| Labor <sup>c</sup> and shipping                     | \$27.35 (380)          | \$17.53 (100)         | \$47.49 (280)         |

<sup>b</sup> Prescription medication (varenicline, bupropion) costs are 2018 average wholesale prices minus 20% from the MicroMedex Red Book. Over-the-counter medication (nicotine patch, lozenge) are based on the lowest price identified through online vendors (e.g., CVS, Wallgreens, Target, Walmart). Costs were the same for both sites.

<sup>c</sup> Research assistant time [both sites] and psychiatrist time [Site B medication reconciliation only]

**eTable 5. Descriptions of Simulation Parameters: Other Resources**

|                                                            | <i>Overall</i>                   | <i>Site A</i>                    | <i>Site B</i>                    |
|------------------------------------------------------------|----------------------------------|----------------------------------|----------------------------------|
| Written patient materials (printing, postage) <sup>d</sup> | \$27.26 per enrolled participant | \$48.67 per enrolled participant | \$13.72 per enrolled participant |
| Office space and related overhead                          | \$281.25 per FTE per month       | \$281.25 per FTE per month       | \$281.25 per FTE per month       |

<sup>d</sup> Per enrolled participant costs include costs of screening participants who did not enroll; site-specific variation reflects the differences in enrollment yield at the two sites.

**eTable 6. Descriptions of Simulation Parameters: Wages<sup>e</sup>**

| <i>Wages (32% fringe included)</i> | <i>Rate</i> | <i>Role</i>                                                                                         | <i>Notes</i>                                                                                                                                      |
|------------------------------------|-------------|-----------------------------------------------------------------------------------------------------|---------------------------------------------------------------------------------------------------------------------------------------------------|
| Psychologist                       | \$82.02     | Training and supervising the counseling and administrative staff                                    | Wage is 90 <sup>th</sup> percentile of national average, reflecting the training/expertise required for the role.                                 |
| Social worker                      | \$28.54     | Counselors                                                                                          | Site B only                                                                                                                                       |
| Nurse practitioner                 | \$67.93     | Counselors                                                                                          | Site A only                                                                                                                                       |
| Psychiatrist                       | \$134.73    | Medication reconciliation                                                                           | Site B only; mean but not median wage is reported for psychiatrists – median is imputed based on the ratio mean:median wages for other physicians |
| Research Assistant                 | \$29.59     | Program administration and support, participant identification and recruitment, medication delivery | In practice, role might be fulfilled by a social worker and/or medical assistant.                                                                 |

<sup>e</sup>Based on 2018 U.S. national median wages obtained from the U.S. Bureau of Labor Statistics ([www.bls.gov/oes/current/oes-nat.htm](http://www.bls.gov/oes/current/oes-nat.htm)), except where noted.

**eTable 7. Descriptions of Simulation Parameters: Stochastic Parameters<sup>f</sup>**

| <i>Parameter</i>                  | <i>Distribution</i> | <i>Source</i>                    | <i>Notes</i>                                                                                             |
|-----------------------------------|---------------------|----------------------------------|----------------------------------------------------------------------------------------------------------|
| Number of medications filled      | Beta                | Assumed                          | Separate draws for each medication for each simulated analysis                                           |
| Medication cost                   |                     |                                  | Independent cost multipliers for each medication.                                                        |
| Wage multiplier                   | Beta                | Assumed                          | One multiplier applies to all wages in a simulated analysis (i.e., variation is correlated across wages) |
| Written patient materials         | Beta                | Assumed                          |                                                                                                          |
| Office space and related overhead | Beta                | Assumed                          |                                                                                                          |
| Time to screen patients           | Beta                | Assumed                          |                                                                                                          |
| Number of patients screened       | Beta                | Assumed                          |                                                                                                          |
| Counseling prep time              | Beta                | Assumed                          |                                                                                                          |
| Counseling sessions attended      | Normal              | Observed mean and standard error |                                                                                                          |
| Duration of counseling sessions   | Normal              | Observed mean and standard error |                                                                                                          |
| Duration of documentation time    | Normal              | Observed mean and standard error |                                                                                                          |
| Call attempts                     | Beta                | Assumed                          |                                                                                                          |

<sup>f</sup>Where distributions were assumed we used multipliers drawn from a beta distribution to add stochastic variability to a simulation parameter. All multipliers randomly drawn from a beta distribution with a mean of 1 and a 99% confidence interval of 0.9 to 1.1. As an example, the mean cost of nicotine patches was \$51.96; the value used in a simulation was \$51.96 multiplied by the randomly-drawn multiplier.
